# Supplementary material
Source: PubMed Central journal article supplement (PMC514446)

## Soleil Index

Soleil Index is: 11 / 12 Xcorr is: 2.1157

Parent M/Z: 562.8 NL M/Z: 513.8

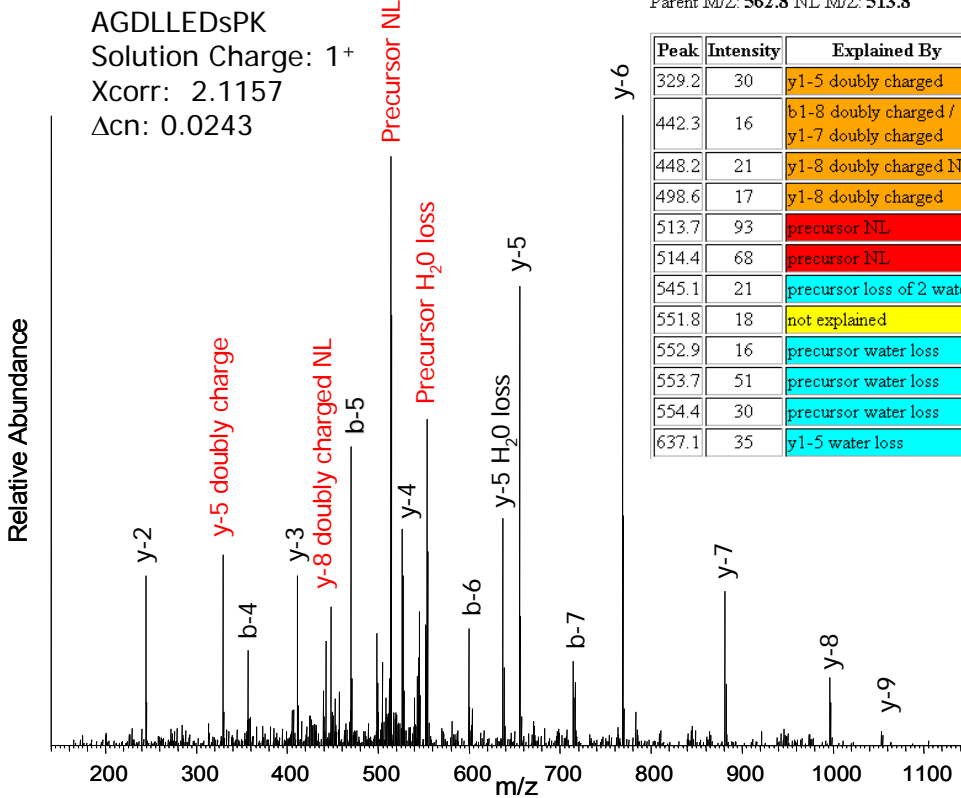

## Soleil Index

Soleil Index is: 11 / 11 Xcorr is: 2.2335

Parent M/Z: 686.8 NL M/Z: 637.8

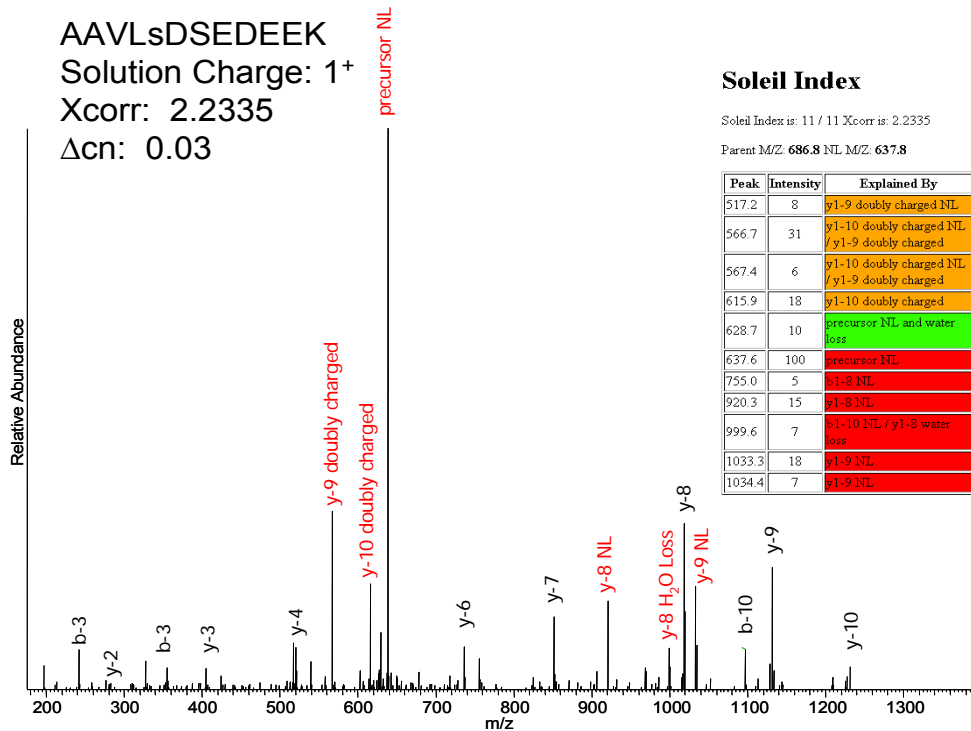

Supplement: pnas_101_33_12130__1.pdf [file pnas_101_33_12130__1.pdf]
